# Supplementary material for: FAD-dependent lysine-specific demethylase-1 regulates cellular energy expenditure
Source: PubMed Central journal article supplement — Nat Commun. 2012 Mar 27;3:758–. doi: 10.1038/ncomms1755 (PMC3316891; doi:10.1038/ncomms1755), 2012-03-27
Supplement: ncomms1755-s1.pdf [file ncomms1755-s1.pdf]

## **SUPPLEMENTARY INFORMATION**

### **FAD-dependent lysine-specific demethylase-1 regulates cellular energy expenditure**

Shinjiro Hino, Akihisa Sakamoto, Katsuya Nagaoka, Kotaro Anan, Yuqing Wang, Shinya Mimasu, Takashi Umehara, Shigeyuki Yokoyama, Ken-ichiro Kosai,  
and Mitsuyoshi Nakao

**- SUPPLEMENTARY FIGURES S1-S7**

**- SUPPLEMENTARY TABLES S1-S4**

**- SUPPLEMENTARY METHODS**

**Measurement of cellular FAD content**

**Animal studies**

**- SUPPLEMENTARY REFERENCE**

## SUPPLEMENTARY FIGURES

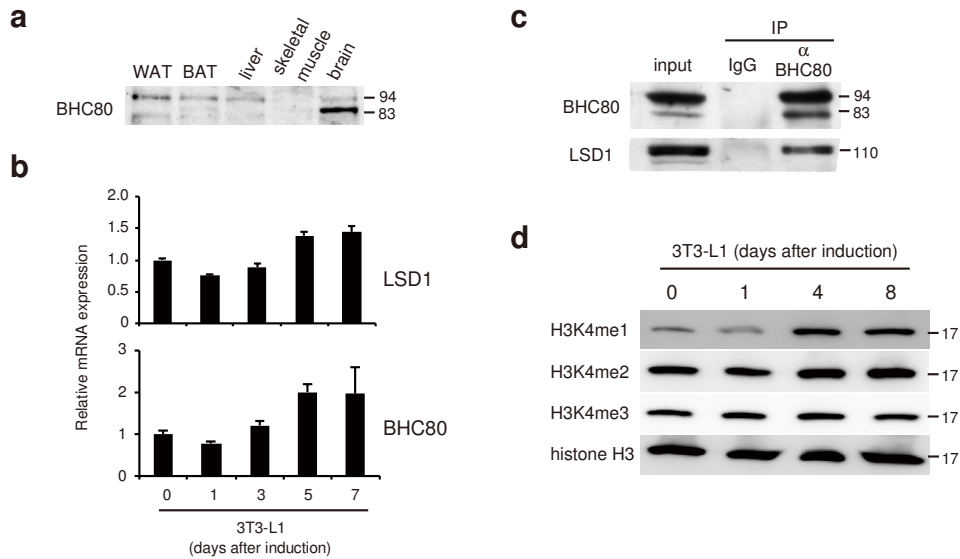

### Supplementary Figure S1. Expression of LSD1 and BHC80 in adipose tissues and cells.

(a) Expression of BHC80 protein in mouse tissues. Size markers indicate the two splice variants of this protein. The longer form of BHC80 was dominantly expressed in WAT. (b) The mRNA expression of LSD1 and BHC80 in adipogenic 3T3-L1 cells. Values are means  $\pm$  SD of triplicate results. (c) Interaction between LSD1 and BHC80 proteins. Co-immunoprecipitation experiment was performed using 3T3-L1 adipocytes. Input lane contains the 10 % of the total amount of whole cell extract relative to IP lanes. (d) The time course of histone H3K4 methylation levels during the adipogenesis of 3T3-L1 cells. Acid extracted nuclei were used for the western blot analyses.

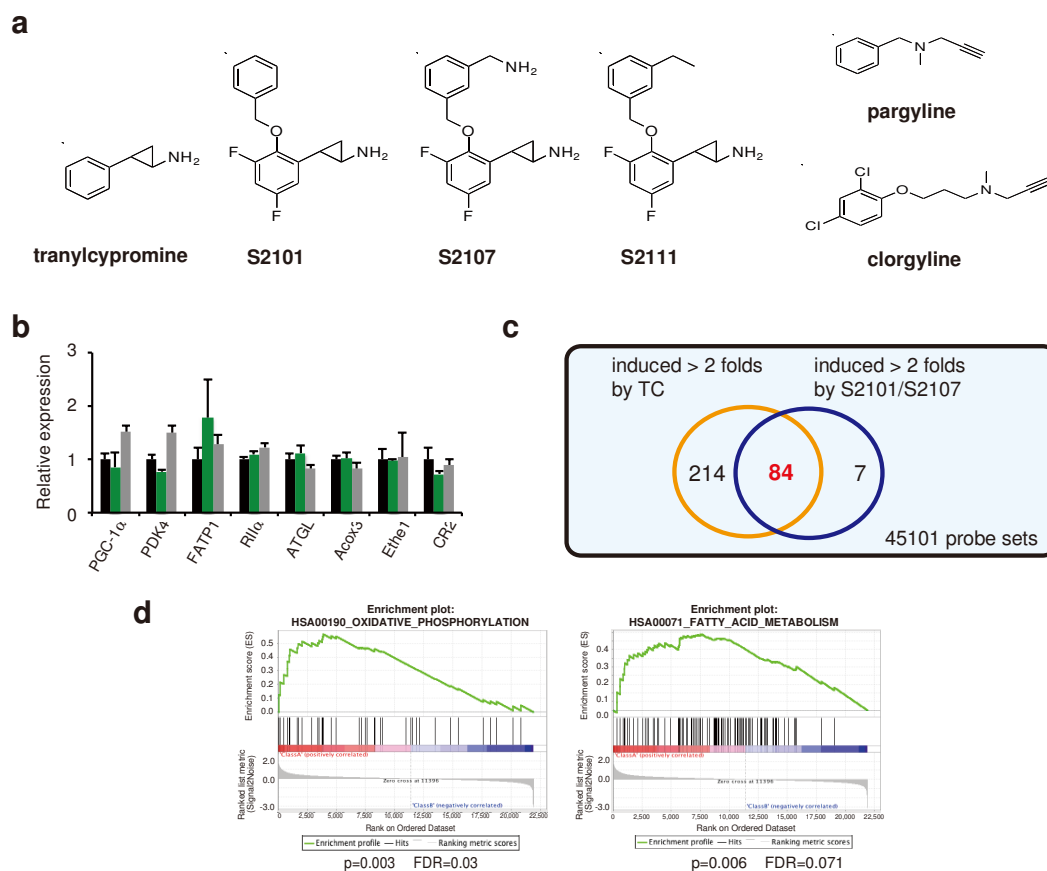

## Supplementary Figure S2. Selective LSD1 inhibitors and monoamine oxidase inhibitors.

(a) Chemical structures of tranylcypromine (TC; non-selective) and SLIs (S2101, S2107, S2111) are shown. The structures of MAO inhibitors, pargyline (parg) and clorgyline (clorg) are also shown. (b) The effects of MAO inhibitors on LSD1-target gene expression in differentiating adipocytes. Parg (green bars) was used at the concentration of  $10^{-4}$  M, and clorg (gray bars) at  $10^{-5}$  M. The relative mRNA expression is presented as the fold difference against vehicle control (black bars). Values are means  $\pm$  SD of triplicate results. (c) Overlapping effect of TC and SLIs on the gene expression profile. Venn diagram shows the probe sets up-regulated by TC or S2101/S2107. S2101/S2107 subgroup is composed of the probe sets, which were up-regulated both by S2101 and S2107. TC was used at the concentration of  $10^{-4}$  M, whereas S2101 and S2107 were at  $10^{-5}$  M. (d) Gene Set Enrichment Analysis of commonly up-regulated genes by TC and S2101/S2107 treatments.

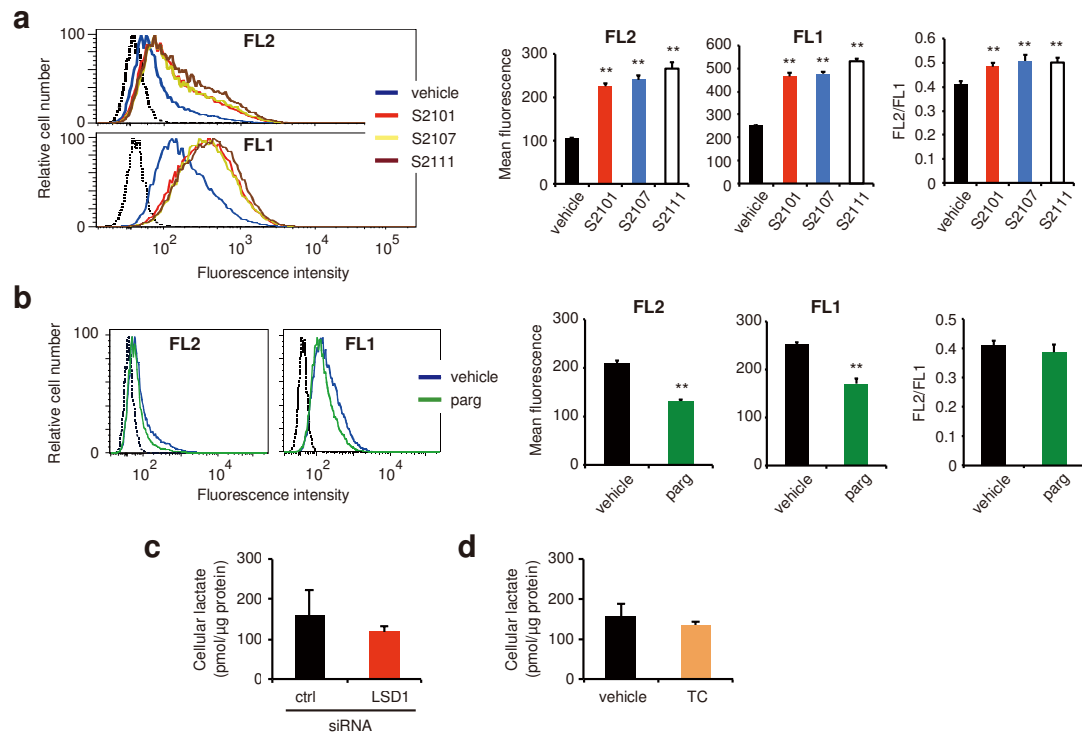

**Supplementary Figure S3. LSD1 inhibition enhances energy mobilization in adipocytes.**

(a and b) Mitochondrial energy metabolism was assessed in differentiating 3T3-L1 cells under  $10^{-5}$  M SLI treatment (a) and  $10^{-4}$  M parg treatment (b). Cells were stained with JC-1 as described in Fig. 5. \*\* $p < 0.01$  vs vehicle by Student's *t*-test. (c and d) Effect of LSD1 inhibition on the glycolytic pathway. Glycolytic activity was determined by measuring the cellular lactate production. After siRNA introduction (c) or TC addition (d), 3T3-L1 cells were subjected to adipogenic induction for 24 hours. Cells were collected and used for lactate measurement and total protein measurement. Values are means  $\pm$  SD of triplicate samples.

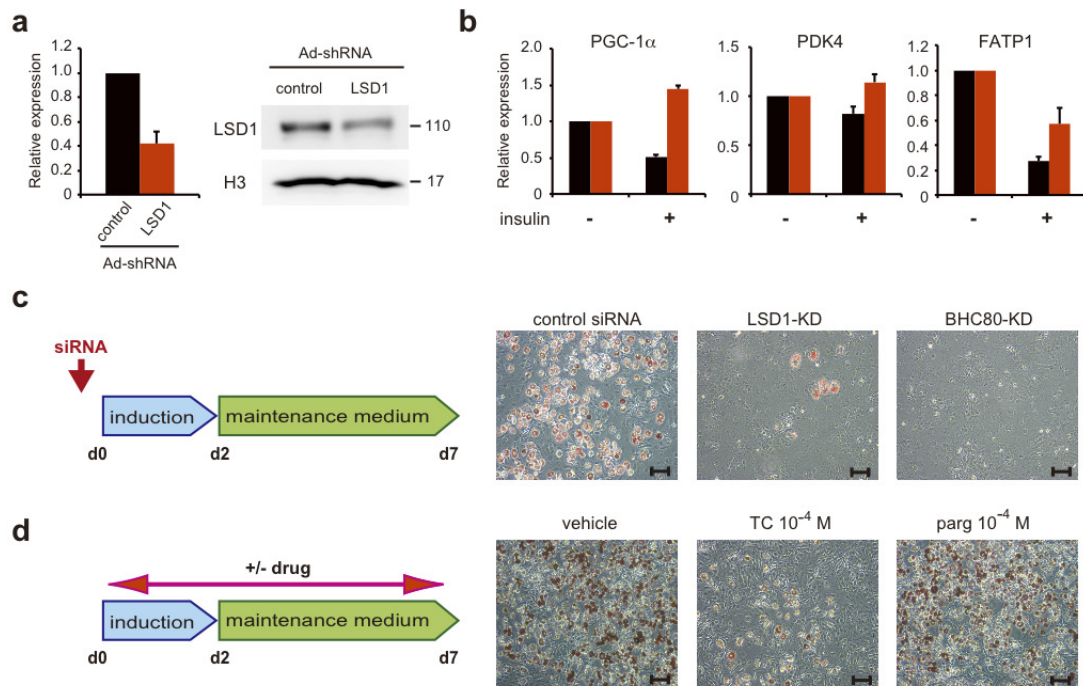

**Supplementary Figure S4. LSD1 inhibition in mature and differentiating adipocytes.**

(a) Adenovirus-mediated knockdown of *LSD1* gene in mature adipocytes. 3T3-L1 adipocytes were collected for RNA and protein analyses at four days after AdV infection. Values are means  $\pm$  SD of triplicate results. (b) LSD1-KD attenuates the insulin-dependent repression of energy expenditure genes in mature adipocytes. Fully differentiated 3T3-L1 cells were treated with insulin and infected with control (black bars) or LSD1 (red bars) shRNA-containing adenoviruses as indicated in **Figure 5d**. Values are indicated as fold difference relative to untreated (insulin(-)) samples. Values are means  $\pm$  SD of triplicate results. (c) Effect of LSD1 or BHC80-knockdown (KD) on lipid accumulation in differentiating adipocytes. siRNA-introduced 3T3-L1 cells were subjected to adipogenic induction for 48 hours and then cultured for an additional 5 days, followed by oil red O staining. (d) Effect of tranylcypromine (TC) treatment on lipid accumulation. 10<sup>-4</sup> M of TC or pargyline (parg) was added to differentiating 3T3-L1 cells, as indicated on the diagram. Scale bars are 100  $\mu$ m.

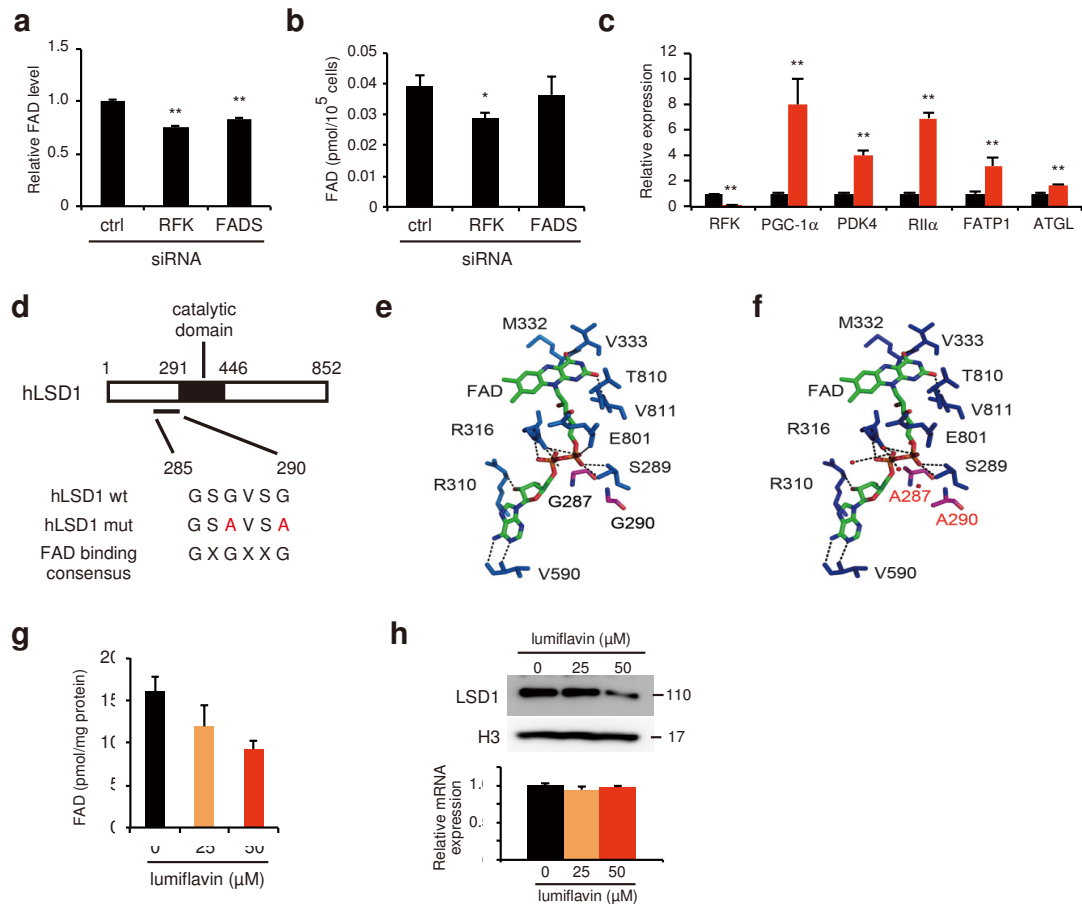

### Supplementary Figure S5. Cellular FAD-dependent activities of LSD1.

(a and b) Measurement of cellular FAD content in RFK-KD and FADS-KD cells. Values are means  $\pm$  SD of triplicate samples. \* $p$ <0.05, \*\* $p$ <0.01 vs control siRNAs by Student's  $t$ -test. (a) Relative FAD content was assessed by measuring the autofluorescence of cells by flow cytometry analysis. Specific siRNA-introduced 3T3-L1 preadipocytes were trypsinized and suspended in PBS for FACS analysis. (b) FAD content determined using a FAD Assay Kit (BioVision). Values are expressed as pmols per 10<sup>5</sup> cells. (c) Up-regulation of LSD1-target genes by RFK-KD was extensively confirmed using an alternative siRNA against the *RFK* gene (RFK#2, red bars). Values are shown as the fold difference against control siRNA-introduced samples (black bars). Values are means  $\pm$  SD of triplicate samples. \*\* $p$ <0.01 vs control siRNA by Student's  $t$ -test. (d) The FAD-binding motif of LSD1. FAD-binding sequences were point-mutated as indicated in red. (e and f) Structural model of the wild- and mutant-type FAD binding site of human LSD1. Wild type (e) and GxAxxA mutant type (f) of LSD1 are shown. Mutated amino acids are indicated in red. (g) Decrease in cellular FAD content by lumiflavin treatment. 3T3-L1 cells were treated with the indicated concentrations of lumiflavin for 48 hours, followed by FAD measurement. Values are means  $\pm$  SD of triplicate samples. \*\* $p$ <0.01 vs vehicle by Student's  $t$ -test. (h) LSD1 protein and mRNA levels in lumiflavin treated cells. Values are means  $\pm$  SD of triplicate samples.

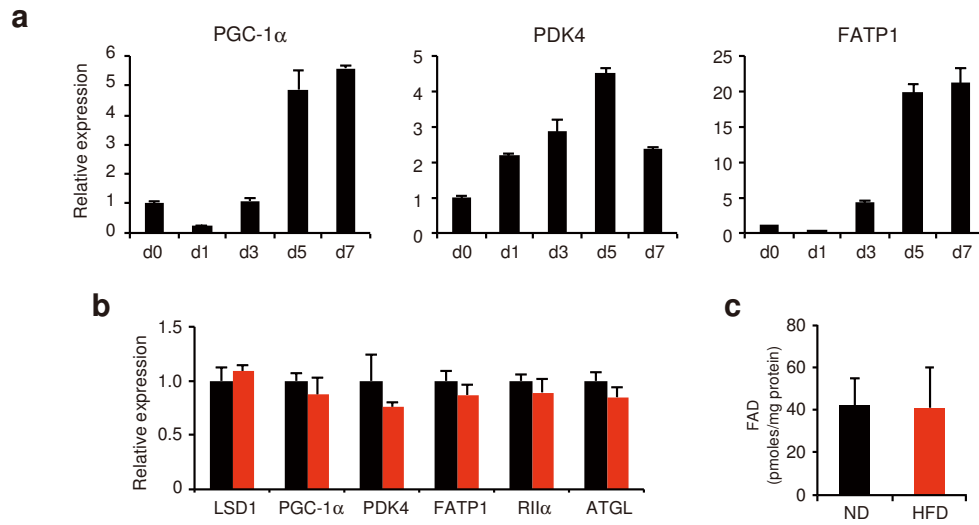

**Supplementary Figure S6. LSD1-target gene expression in FAD-increasing conditions.**

(a) The transition of LSD1 target gene expression during adipogenesis. Values are means  $\pm$  SD of triplicate samples. (b) Effect of palmitate treatment on the expression of LSD1-target genes. Mature 3T3-L1 adipocytes were treated either with BSA (black bars) or 500  $\mu$ M sodium palmitate (red bars) for 24 hours before RNA analysis. Values are means  $\pm$  SD of triplicate samples. (c) FAD concentrations in epididymal adipose tissues from normal diet (ND)- and high fat diet (HFD)- fed mice. Six-week-old C57BL/6 male mice were fed with ND or HFD for four weeks, and were subjected to FAD measurement. Values are means  $\pm$  SD of four mice.

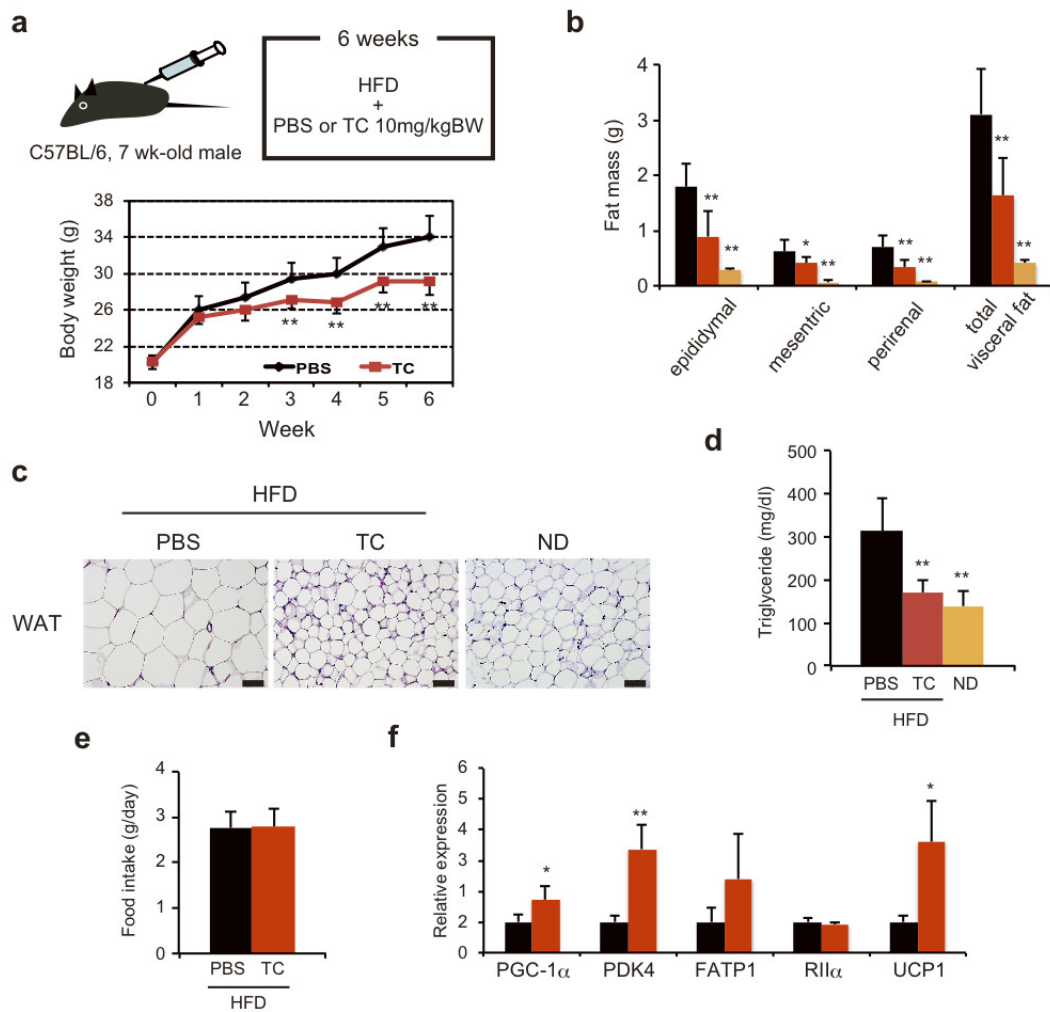

**Supplementary Figure S7. Administration of tranlycypromine attenuates high fat diet-induced obesity and activates energy expenditure genes in white adipose tissue.**

(a) Body weight change during the test period. Seven-week old C57BL/6J mice were fed with HFD for six weeks in combination with alternate-day administration of tranlycypromine (TC) (10 mg/kg body weight) or PBS-control (n=8 for each group). (b) Effect of LSD1 inhibition on visceral fat mass. Individual and total fat mass at three depots were measured in HFD/PBS (black bars, n=8), HFD/TC (red bars, n=8) and ND mice (orange bars, n=4). Values are means  $\pm$  SD. (c) Histological sections of epididymal WAT from the HFD/PBS, HFD/TC and age-matched ND-fed mice. Scale bars indicate 50  $\mu$ m. (d) Concentration of triglyceride in blood. Samples were obtained on the final day after 16-hour starvation. Values are means  $\pm$  SD (n=8 for HFD, n=4 for ND). (e) No effect of TC administration on food intake. Food intake in mice tested was repeatedly determined by measuring the amount of food remaining after 24-hour feeding. There were no abnormal behavior and neurological aspects in TC-treated mice. Values are means  $\pm$  SD of eight mice. (f) Effect of TC administration on expression of LSD1-target genes in epididymal WAT of HFD-fed mice. HFD/PBS (black bars), HFD/TC (red bars). Values are means  $\pm$  SD of eight mice. All histogram values are indicated as the fold difference against HFD/PBS. \*p<0.05, \*\*p<0.01 vs. HFD/PBS by Student's *t*-test.



**Supplementary Table S1 - The expression levels of genes associated with adipogenic differentiation**

| Probe set    | Description                                      | Common name   | Relative expression compared to control |          |                       |
|--------------|--------------------------------------------------|---------------|-----------------------------------------|----------|-----------------------|
|              |                                                  |               | LSD1-KD                                 | BHC80-KD | TC 10 <sup>-4</sup> M |
| 1418982_at   | CCAAT/enhancer binding protein (C/EBP), alpha    | CEBP $\alpha$ | 1.4                                     | 0.3      | 1.2                   |
| 1418901_at   | CCAAT/enhancer binding protein (C/EBP), beta     | CEBP $\beta$  | 1.0                                     | 1.1      | 0.9                   |
| 1423233_at   | CCAAT/enhancer binding protein (C/EBP), delta    | CEBP $\delta$ | 1.2                                     | 1.1      | 0.8                   |
| 1427683_at   | early growth response 2                          | Krox20        | 0.7                                     | 0.8      | 0.6                   |
| 1451021_a_at | Kruppel-like factor 5                            | KLF5          | 2.3                                     | 1.0      | 2.1                   |
| 1420715_a_at | peroxisome proliferator activated receptor gamma | PPAR $\gamma$ | 0.9                                     | 1.7      | 0.7                   |
| 1440870_at   | PR domain containing 16                          | Prdm16        | Flag "absent" in all samples            |          |                       |

**Supplementary Table S2 - IC50 values of LSD1 and MAO inhibitors**

| <b>IC<sub>50</sub> (μM)*</b> | <b>LSD1</b> | <b>MAO-A</b>  | <b>MAO-B</b> |
|------------------------------|-------------|---------------|--------------|
| clorgyline                   | >500        | 0.053 ± 0.011 | 5.2 ± 0.13   |
| pargyline                    | >500        | 15 ± 3.5      | 0.23 ± 0.016 |
| tranylcypromine              | 110 ± 11    | 18 ± 2.0      | 0.90 ± 0.094 |
| S2101                        | 1.3 ± 0.52  | 37 ± 1.9      | 15 ± 7.0     |

\*Inhibition assays were performed using the peroxidase-coupled reaction method.

### Supplementary Table S3 - siRNAs target sequences

---

---

| <b>Genes</b>     | <b>siRNA target sequence</b>                                               |
|------------------|----------------------------------------------------------------------------|
| GL3              | 5'-GATTTTCGAGTCGTCTTAAT-3'<br>(control, targeting pGL3 luciferase plasmid) |
| lamin A/C, human | 5'-CTGGACTTCCAGAAGAACA-3'<br>(control, used in luciferase assays)          |
| BHC80            | 5'-GTTCCAGATACAGCCATTG-3'                                                  |
| LSD1             | 5'-CACAAAGGAAAGCTAGAAGA-3'                                                 |
| LSD1 #2          | 5'-CAGAGAGATCCAACGGCAT-3'                                                  |
| RFK              | 5'-TCTTCCAGCTGATGTGTGT-3'                                                  |
| RFK #2           | 5'-GTCCCTTACCTGCCTACCA-3'                                                  |
| FADS             | 5'-GAGCCCTTGGAGGAATGTC-3'                                                  |

---

## Supplementary Table S4 - Primers used in the study

| Gene Name                        | Forward (5'-3')                                             | Reverse (5'-3')                                             |
|----------------------------------|-------------------------------------------------------------|-------------------------------------------------------------|
| <b>Quantitative RT-PCR</b>       |                                                             |                                                             |
| 36B4                             | GCGTCCTGGCATTGTCTGT                                         | GCAAATGCAGATGGATCAGCC                                       |
| Acox3                            | AAGAAGCTGGGGCAGAATGG                                        | GCCCTCAGAGGTGATATTCC                                        |
| AdipoQ                           | TCTGTACGATTGTCAGTGGA                                        | AGTAACGTCATCTTCGGCAT                                        |
| ATGL                             | GCCAACGCCACTCACATCTA                                        | GCCTCCTTGGACACCTCAAT                                        |
| BHC80                            | GAAGCAGGATCCACAGAATG                                        | TTGCGCAGCTGCTCAACTA                                         |
| CR2                              | AAGCTGAATTCAGTGGCCT                                         | CTTCACAGTGTCCCGTCCAA                                        |
| FABP4                            | GGAAGCTTGTCTCCAGTGAA                                        | TTACGCTGATGATCATGTTG                                        |
| FADS                             | TAGCCTCAGCCATTTAGTC                                         | CCAGATGTTTCTGTAGGTCC                                        |
| FATP1                            | TTTCTGCGTATCGTCTGCAA                                        | CCGAACACGAATCAGAACA                                         |
| Ethe1                            | GCCCAGGCTGATTTGCATAT                                        | GTGACACAGCCTGGAGTGTG                                        |
| Glut4                            | GTCGGGTTTCCAGCAGATC                                         | AACTGAAGGGAGCCAAGCA                                         |
| LSD1                             | ATGGATGTCACACTTCTGGA                                        | CAAGACCTGTTACAACCATG                                        |
| PDK4                             | CAAGGAGATCTGAATCTCTA                                        | GATAATGTTTGAAGGCTGAC                                        |
| PGC-1 $\alpha$                   | AAGTGTGAACTCTCTGGAAGT                                       | GGGTTATCTTGGTTGGCTTTATG                                     |
| PPAR $\gamma$ 2                  | TCGCTGATGCACTGCCTATGAG                                      | GAGGTCCACAGAGCTGATTCC                                       |
| RFK                              | CATTGGATGGAACCCGTA                                          | CCAACAATGGCCACATTGAG                                        |
| Ril $\alpha$                     | AACTGATGAGCAGAGATGCC                                        | AACATGGCATCCAGAAGTTG                                        |
| UCP1                             | GGCCCTTGTAACAACAAAATAC                                      | GGCAACAAGAGCTGACAGTAAAT                                     |
| <b>ChIP-quantitative PCR</b>     |                                                             |                                                             |
| ATGL                             | TGCCCAAGCTGTGGGATTGA                                        | AGCCATCTGAGAGACCTGGA                                        |
| FATP1                            | CGCCCAGGACTCTGCAAAG                                         | CACAGAAGTCTGGACTGGGA                                        |
| PDK4                             | CTGGCTAGGAATGCGTGACA                                        | GATCCCAGGTCGCTAGGACT                                        |
| PGC-1 $\alpha$                   | 1 GTCTAATTGAGACTGGCTGTG                                     | CAACATGTTGAGCAACTCAGC                                       |
|                                  | 2 GTTGACTGTGTGAAAAGTAGA                                     | TAGTAGCCTTACTCTGTACTCC                                      |
|                                  | 3 CAGTGTGATGCTTGAAGCCT                                      | TCCTGACGTCCTCCAAGG                                          |
|                                  | 4 AAGCTTGACTGGCGTCATTC                                      | GCTCCGGTCCCTGCAATACTC                                       |
|                                  | 5 TCAAAGATGCCTCCTGTGAC                                      | CAAGGAGAGACCTGCTTGCT                                        |
|                                  | 6 CACAAACACCTGGCACTCAC                                      | CCACTTGCCTCATGCTGACA                                        |
| MyoD                             | TTTGCTGGTCTCCAGAGTG                                         | CCTCTCCAGTGTCTACTCCT                                        |
| Major satellite                  | GACGACTTGAAAATGACGAAATC                                     | CATATTCCAGGTCTCAGTGTGC                                      |
| PGC-1 $\alpha$ /Luc-5'           | AAGTGCAGGTGCCAGAACAT                                        | TGTCCCAACGTATAGGCGTG                                        |
| PGC-1 $\alpha$ /Luc-3'           | AGTGTGTGCTGTGTGCAGA                                         | AACAGTACCGGAATGCCAAG                                        |
| <b>Site directed mutagenesis</b> |                                                             |                                                             |
| LSD1, GxAxxA                     | ATTATAGGCTCTG <u>C</u> GGTC-<br>-TCAG <u>C</u> CTTGGCAGCAGC | GCTGCTGCCAAG <u>G</u> CTGAG-<br>-ACC <u>G</u> CAGAGCCTATAAT |

Letters with underlines indicate the mutated nucleotides



## **SUPPLEMENTARY METHODS**

### **Measurement of cellular and tissue FAD content**

FAD content was determined using a FAD Assay Kit (BioVision) according to the manufacturer's protocol. Protein-bound FAD was dissociated using a Deproteinizing Sample Preparation Kit (BioVision) prior to FAD measurements. Alternatively, relative FAD content was determined by measuring the autofluorescence of cells by FACS<sup>60</sup>. Cells were trypsinized and suspended in PBS for immediate analysis. FAD autofluorescence was detected with the FL1 setting of a FACSCanto flow cytometer (excitation and emission wavelength of 488 and 525 nm, respectively). Values were calculated based on the mean fluorescence intensity of each sample. FAD concentrations were normalized to either cell numbers or protein concentrations determined using the Protein Assay Reagent (Bio-Rad).

### **Animal studies**

Animal experiments were conducted in accordance with the guidelines of the Animal Care and Use Committee of Kumamoto University. For obesity induction experiments, seven-week old male C57BL/6J mice were fed a high fat diet (HFD21: Japan Clea) for six weeks in combination with intraperitoneal injections of PBS-control or 10mg/kg body weight of tranylcypromine every other day. Body weight was monitored weekly throughout the test period. Twenty four-hour food intake was assessed five times during weeks 4 to 6. Before being sacrificed, mice were fasted for 16 hours before blood was

collected to analyze the triglyceride concentrations. Collected tissues were weighed and dissected for RNA extraction and histological analyses.

#### **SUPPLEMENTARY REFERENCE**

- 60 Smelt, M. J., Faas, M. M., de Haan, B. J. & de Vos, P. Pancreatic beta-cell purification by altering FAD and NAD(P)H metabolism. *Exp Diabetes Res* **2008**, 165360, (2008).
